1 **A domestic cat whole exome sequencing resource for trait discovery**

2 Alana R. Rodney<sup>1,\*</sup>, Reuben M. Buckley<sup>2,\*</sup>, Robert S. Fulton<sup>3</sup>, Catrina Fronick<sup>3</sup>, Todd  
3 Richmond<sup>4</sup>, Christopher R. Helps<sup>5</sup>, Peter Pantke<sup>6</sup>, Dianne J. Trent<sup>7</sup>, Leslie A. Lyons<sup>2</sup>,  
4 Wesley C. Warren<sup>1,†</sup>.

5 <sup>1</sup>Department of Animal Sciences, College of Agriculture, Department of Surgery, School  
6 of Medicine, Institute for Data Science and Informatics, University of Missouri, Columbia,  
7 Missouri, 65211, USA

8 <sup>2</sup>Department of Veterinary Medicine & Surgery, College of Veterinary Medicine, University  
9 of Missouri, Columbia, Missouri, 65211, USA

10 <sup>3</sup>McDonnell Genome Institute, Washington University, School of Medicine, St Louis,  
11 Missouri, 63108, USA

12 <sup>4</sup>Roche Sequencing Solutions and Life Sciences, Indianapolis, Indiana, 46250, USA

13 <sup>5</sup>Langford Vets, University of Bristol, Langford, Bristol, BS40 5DU UK

14 <sup>6</sup>AniCura Bielefeld GmbH, Tierärztliche Klinik für Kleintiere, Bielefeld, 33719, Germany

15 <sup>7</sup>Department of Biomedical and Diagnostic Sciences, College of Veterinary Medicine,  
16 University of Tennessee, Knoxville, Tennessee, 37996 USA

17 \*Authors provided equal contribution

18 †Corresponding author: warrenwc@missour.edu

19 Running title: **Feline exome sequencing resources**

20 Keywords: Animal models, feline, exome, *Felis catus*, WES, Precision Medicine

21

22 **Abstract**

23 Over 94 million domestic cats are considered pets, who, as our companions, are also  
24 susceptible to cancers, common and rare diseases. Whole exome sequencing (WES) is  
25 a cost-effective strategy to study their putative disease-causing variants. Presented is  
26 ~35.8 Mb exome capture design based on the annotated *Felis\_catus\_9.0* genome  
27 assembly, covering 201,683 regions of the cat genome. WES was conducted on 41 cats  
28 from various breeds with known and unknown diseases and traits, including 10 cats with  
29 prior whole genome sequence (WGS) data available, to test WES capture probe  
30 performance. A WES and WGS comparison was completed to understand variant  
31 discovery capability of each platform. At ~80x exome coverage, the percent of on-target  
32 base coverage >20x was 96.4% with an average of 10.4% off-target. For variant  
33 discovery, greater than 98% of WGS SNPs were also discovered by WES. Platform  
34 specific variants were mainly restricted to a small number of sex chromosome and  
35 olfactory receptor genes. Within the 41 cats with ~31 diseases and normal traits, 45  
36 previously known disease or trait causal variants were observed, such as Persian  
37 progressive retinal degeneration and hydrocephalus. Novel candidate variants for  
38 polycystic kidney disease and atrichia in the Peterbald breed were also identified as well  
39 as a new cat patient with a known variant for cystinuria. These results show the discovery  
40 potential of deep exome sequencing to validate existing disease gene models and identify  
41 novel gene candidate alleles for many common and rare diseases in cats.

42

## 43 **Introduction**

44 Precision / Genomic medicine is the next frontier to conquer in veterinary medicine,  
45 however, the appropriate resources are necessary for robust implementation of genomic  
46 medicine in clinical practice<sup>1</sup>. One tool, which has been successfully applied to the  
47 diagnosis of rare diseases in humans, is whole exome sequence (WES) analysis, a cost-  
48 effective method for identifying potentially impactful DNA variants in the coding regions  
49 of genes<sup>2</sup>. Alternatively, whole genome sequencing (WGS), captures DNA variants  
50 spanning the entire genome for which the vast majority have an unpredictable impact.  
51 The increased cost of WGS analysis raises the question whether, WES, the more  
52 affordable option, can be just as effective for diagnosing novel disease variants in cats?

53 Over the last decade, a surge of studies using next generation sequencing, in particular  
54 WES, has led to many novel discoveries in disease causation. WES became recognized  
55 as a more efficient means for genome resequencing in 2007 and has increasingly been  
56 used to help diagnose patients with rare and genetic diseases<sup>3,4</sup>. By selectively  
57 sequencing all protein-coding regions to great depth, WES is a dependable method to  
58 find exome variants<sup>5</sup>. Most often WES is a powerful approach to study Mendelian  
59 inherited diseases because highly functional impact variants rarely appear in the healthy  
60 populations<sup>6 7</sup>. In humans, exome sequencing has been used to study a wide-range of  
61 diseases, cancers, and analysis of autism spectrum disorder<sup>8,9,10</sup>. The discovery of exome  
62 variants has led to therapeutic targets for drug development, and genetic markers for  
63 innovative clinical applications in companion animals and humans<sup>11,3</sup>. The exome-only  
64 approach is especially successful in cancer studies by cost-effectively providing variant

65 information about the normal and tumor genomes within patients, supporting the  
66 identification of tumor drivers that may indicate a druggable potential for therapy<sup>12</sup>.

67 Exome sequencing has also proven successful in various species. In mice, exome data  
68 has been used to study Mendelian inherited disorders, and to complete a cross-species  
69 analyses with humans<sup>13,14</sup>. In 2014, the first dog exome capture study demonstrated that  
70 provided sufficient coverage, an average of 90% of bases and targets covered, causative  
71 allele discovery has great potential<sup>15-18</sup>. Since the development of the dog WES  
72 capabilities, several studies have been successful in identification of causal variants for  
73 various diseases including a two base pair deletion in *SGCD* for muscular dystrophy, and  
74 a splice site variant in *INPP5E* in dogs with cystic renal dysplasia<sup>19,20</sup>. The domestic dog  
75 with a large number of isolated breeds are an important genetic resource for cancer  
76 studies, and WES has shown similar oncogene variant patterns that enable comparative  
77 analysis in humans<sup>21,22</sup>. On the other hand, an analysis of human and canine bladder  
78 cancer using WES data identified novel mutations in *FAM133B*, *RAB3GAP2*, and  
79 *ANKRD52* that are unique to canine bladder cancer suggesting biological differences in  
80 origin<sup>23</sup>.

81 Cats have long been recognized for their potential in modeling some human diseases,  
82 such as retinal blindness and testing for clinical therapies<sup>24,25</sup>. In domestic cats,  
83 approximately 150 variants are associated with over 100 genetic traits or diseases, many  
84 as biomedical models for human diseases<sup>26</sup>. As feline genomic resources continue to  
85 advance, greater numbers of diseases caused by single base variants are being  
86 discovered, such as two novel forms of blindness in Persians and Bengal cats<sup>27,28</sup>.

87 This study outlines the development and performance of cat WES approaches and  
88 demonstrates its use to identify putatively causative alleles for disease and normal trait  
89 phenotypes. Our WES analyses included 41 cats with phenotypes in which causative  
90 alleles are known and/or unknown, leading to the discovery of three novel, likely causal,  
91 disease variants and the confirmation of a variety of known diseases and traits and their  
92 population allele frequencies. These results prove the discovery potential of feline WES  
93 to validate existing disease gene models and identify new ones.

## 94 **Methods**

95 **Exome design.** The annotated exons from the *Felis\_catus\_9.0* reference genome  
96 assembly were used as the basis to design the exome capture probes<sup>29</sup>, incorporating  
97 the NCBI RefSeq release 92 annotation. The coding sequences for the primary  
98 chromosomes were extracted and consolidated into a non-overlapping set of features,  
99 totaling 35,855,889 bases divided over 201,683 regions. Since Y chromosome genes are  
100 not represented in the *Felis\_catus\_9.0* reference, a set of coding sequence features from  
101 the *Felis catus* Y chromosome genomic sequence (NCBI accession KP081775) was  
102 used<sup>30</sup>. The cat exome panel was designed by Roche Sequencing Solutions (Madison,  
103 USA)<sup>31</sup>. A capture probe dataset was constructed for the full cat genome by tiling variable  
104 length probes, ranging from 50 - 100 bases in length, at a five-base step across all  
105 sequences. Each capture probe was evaluated for repetitiveness by constructing a 15-  
106 mer histogram from the full genome sequence and then calculating the average 15-mer  
107 count across each probe, sliding a window size of 15 bases across the length of each  
108 probe. Any probe with an average 15-mer count greater than 100 was considered to be  
109 repetitive and excluded from further characterization. Non-repetitive probes were then  
110 scored for uniqueness by aligning each capture probe to the full cat genome using  
111 SSAHA<sup>32</sup>. A close match to the genome was defined as a match length of 30 bases,  
112 allowing up to five insertions/deletions/substitutions. Capture probes were selected for  
113 each coding sequence feature by scoring one to four probes in a 20-base window, based  
114 on repetitiveness, uniqueness, melting temperature and sequence composition, and then  
115 choosing the best capture probe in that window. The start of the 20 base windows was  
116 then moved 40 bases downstream and the process repeated. Selected probes were

117 allowed to start up to 30 bases before the 5' start of each feature and overhang the 3' end  
118 by 30 bp. A maximum of five close matches in the genome was allowed when selecting  
119 the capture probes.

120 **Samples and DNA Isolation.** Cat DNA samples for WES were donated by owners and  
121 archived in accordance with the University of Missouri Institutional Animal Care and Use  
122 Committee protocol study protocols 9056, 9178, and 9642. DNA was isolated from 41  
123 whole blood or tissue cat samples using standard organic methods<sup>33</sup> and verified for  
124 quantity and quality by DNA fluorescence assay (Qubit, Thermo Fisher) and ethidium  
125 bromide staining after 0.7% agarose gel electrophoresis. Ten cats with existing whole  
126 genome sequence (WGS) data were initially tested followed by 31 novel cats.

127 **Sequencing.** Genomic DNA (250 ng) was fragmented on the Covaris LE220 instrument  
128 targeting 250 bp inserts. Automated dual indexed libraries were constructed with the  
129 KAPA HTP library prep kit (Roche) on the SciClone NGS platform (Perkin Elmer). The  
130 libraries were PCR amplified with KAPA HiFi for 8 cycles. The final libraries were purified  
131 with a 1.0x AMPureXP bead cleanup and quantitated on the Caliper GX instrument  
132 (Perkin Elmer) and were pooled pre-capture generating a total 5µg library pool. Each  
133 library pool was hybridized with a custom Nimblegen probe set (Roche), targeting 35.9  
134 Mb. The libraries were hybridized for 16 - 18 hours at 65°C followed by washing to remove  
135 spuriously hybridized library fragments. Enriched library fragments were eluted following  
136 isolation with streptavidin-coated magnetic beads and amplified with KAPA HiFi  
137 Polymerase prior to sequencing. PCR cycle optimization is performed to prevent over  
138 amplification of the libraries. The concentration of each captured library pool was  
139 accurately determined through qPCR utilizing the KAPA library Quantification Kit

140 according to the manufacturer's protocol (Roche) to produce appropriate cluster counts  
141 prior to sequencing. The Illumina NovaSeq6000 instrument was used to generate 150 bp  
142 length sequences to yield an average of 14 Gb of data per 35.9 Mb target exome,  
143 producing ~60x genome coverage. Exome sequencing data are available at the  
144 Sequence Read Archive under accession number PRJNA627536.

145 **Variation Discovery** The following tools/packages were applied to WGS and WES  
146 samples in accordance with variant processing as previously described<sup>34</sup>, BWA-MEM  
147 version 0.7.17<sup>35</sup>, Picard tools version 2.1.1 (<http://broadinstitute.github.io/picard/>),  
148 Samtools version 1.9,<sup>36</sup> and Genome Analysis toolkit version 3.8<sup>37,38,39</sup>. Code used for the  
149 variant calling workflow can be found at [https://github.com/mu-feline-](https://github.com/mu-feline-genome/batch_GATK_workflow)  
150 [genome/batch\\_GATK\\_workflow](https://github.com/mu-feline-genome/batch_GATK_workflow). For WES processing, GATK tools were restricted to  
151 exons annotated in Ensembl release 97 with an additional 100 bp of flanking sequence<sup>40</sup>.  
152 Following processing, samples were genotyped in three separate cohorts. The first cohort  
153 consisted of all 41 WES samples. The second and third cohorts were ten matched WES  
154 and WGS samples. Variants in all three cohorts were tagged using the same variant  
155 filtering criteria. For SNVs the filtering criteria was, QD < 2.0, FS > 60.0, SOR > 3.0,  
156 ReadPosRankSum < -8.0, MQ < 40.0, and MQRankSum < -12.5. For indels the filtering  
157 criteria was, QD < 2.0, FS > 200.0, SOR > 10.0, and ReadPosRankSum < -20.0. Although  
158 five Y chromosome genes were included in the exome probe set, these genes had not  
159 been added to the aligning reference. For WGS/WES comparison, matched WES/WGS  
160 samples were annotated using variant effect predictor (VEP)<sup>41</sup>. Variants from both cohorts  
161 were independently tagged as whether they were biallelic, SNPs, or passed filtering  
162 criteria. Prior to analysis, variants flanking the exome primary target regions +/- 2bp were



163 removed (**Supplementary Data S1**). Variant processing and comparisons were  
164 performed in the R statistical environment using the vcfR package<sup>42</sup>. Common variants  
165 between both platforms were determined as those at the same position with the same  
166 reference and alternate alleles. Exclusive variants were determined as those where the  
167 position and/or the alleles were specific to a particular platform. The initial ten WES cats  
168 also had WGS data and are in the SRA under BioProject PRJNA308208 as part of the 99  
169 Lives Cat Genome Sequencing Consortium<sup>29</sup>. Each cat had approximately 30x WGS  
170 coverage using an Illumina HiSeq 2500 PE 125 bp using both 350 bp and 550 bp insert  
171 libraries.

172 **Disease and Trait Variant Detection** Variants for all 41 cats were evaluated using  
173 VarSeq software (GoldenHelix, Inc.). SNVs were annotated as having high, moderate or  
174 low impacts on gene function. High impact variations were those that were a protein  
175 truncating variant caused by stop gain or loss and splice-site acceptor or donor  
176 mutations<sup>43</sup>. Moderate impacts include missense mutations or frame insertions, and lastly  
177 low impact variants are characterized by synonymous base changes, splice region  
178 variants or stop retained variance. Known variants for diseases and traits were evaluated  
179 in each cat.

### 180 **Polycystic Kidney Disease**

181 A pointed cat of the Siberian breed (a.k.a. Neva Masquerade) was diagnosed with  
182 polycystic kidney disease based on signs of renal disease (polydipsia, polyuria) and  
183 ultrasonography. DNA was submitted using buccal swabs and a whole blood sample to  
184 two different commercial testing laboratories in which both confirmed the absence of the  
185 currently known autosomal dominant polycystic kidney disease in *polycystin-1*

186 (*PKD1*)<sup>44,45</sup>. The dam and a sibling were also confirmed as having PKD by  
187 ultrasonography but we not available for genetic analyses.

188 **Cystinuria.** A three-month-old European shorthair kitten from the isle of Korfu, Greece,  
189 was presented to the AniCura Small Animal Hospital, Bielefeld, FRG, for heavy straining  
190 during urination and the owner report the kitten would fall over from time to time. The  
191 kitten had been pretreated with two injections of cephalexine and dexamethasone for  
192 suspected cystitis, however, difficulty in urination worsened. Upon hospital admission, the  
193 kitten was in good general condition. Abdominal palpation revealed an enlarged urinary  
194 bladder. Abdominal X-ray showed over 30 radiolucent urinary stones up to a diameter of  
195 half of the width of the last rib. Urinary bladder stones and some urethral stones were  
196 removed via cystolithotomy and retrograde flushing of the urethra. Urinary stones were  
197 submitted for infraspectroscopic stone analysis. Stone analysis revealed pure cystine  
198 stones and a diagnosis of cystinuria was made. Urinary stones reoccurred at six months  
199 of age, but they kitten was otherwise healthy.

## 200 **Results**

201 **Phenotype cohort.** The 41 cats in exome study represent different diseases and traits,  
202 some with known disease alleles others unknown (**Table 1**). The initial ten cats had nine  
203 known disease variants and various known mutations for coat colors and fur types. In the  
204 group of 31 novel exomes, the cats represented 11 different breeds and 14 random bred  
205 cats. Seven pairs of cats were sequenced to evaluate causes for mediastinal lymphoma,  
206 a seizure disorder, eyelid colobomas, hypothyroidism, hypovitaminosis D, blue eyes of  
207 Ojos Azules breed, and curly hair coat of the Tennessee Rex. Five cats were reported  
208 with cardiac diseases, including hypertrophic cardiomyopathy (HCM). At least seven

209 neurological disorders are represented in the study population, generally representing  
210 novel presentations in random bred cats. Overall, the 41 cats had approximately 31  
211 different unknown disease presentations.

212 **Sequence coverage and specificity.** To assess the performance of the feline WES  
213 resource, WES data was produced on ten cats that had WGS data for comparison.  
214 Approximately 55 – 259 million raw reads generated per sample (**Supplementary Table**  
215 **1, Supplementary File 2**). After mapping to Felis\_catus\_9.0, base quality trimming, and  
216 duplicates removal, the percentage of unique reads that mapped to the cat genome  
217 assembly was ~82%. The average sequencing depth was 267x with a range of 76x to  
218 458x (**Supplementary Table 2, Supplementary File 2**). Of the 201,683 exonic targets,  
219 98.1% of the exonic sequences had aligned coverage >20x with an average of 6.47% off-  
220 target sequence (**Supplementary Table 3, Supplementary File 2**). For the novel 31 cat  
221 exomes, the average coverage was 80x ranging from 60 – 108x. The percent of on target  
222 coverage up to 10x was generally 98 – 99%. The percent of on target based covered  
223 >20x was 96.41%, ranging from 91 – 98% with an average of 10.41% off-target sequence.  
224 Across all cats, an average of 82% of reads aligned with a range of 75% to 85% with an  
225 average of >99% of the bases aligned. When looking at targeted bases, an average of  
226 99% of bases aligned with at least 2x coverage. There was a reduction at deeper  
227 coverage, for example at 40 and 100x, 93.5 and 58% of targeted bases were covered,  
228 respectively (**Figure 1**). Approximately 70M reads produced approximately 80x coverage,  
229 which generally ensured >98% of bases had 20x coverage.

230 **WGS versus WES-specific variant discovery.** A set of common variants and platform  
231 (WGS versus WES) exclusive variants were defined and then filtered for quality, variant

232 type, and biallelic status. For high impact variants, WES and WGS identified 582 and 617  
233 SNPs, respectively, with 97.8% of the WES SNPs also identified by WGS and 92.1% of  
234 the SNPs also identified by WES (**Table 2**). The most exclusive percentage of identified  
235 variants were for splice donor / acceptor sites and stop gains, however, the overall count  
236 of these variants was low, ranging from 3 to 19 total variants. Moderate (missense) and  
237 low impact variants had very high concordance between the WES and WGS datasets,  
238 ranging from 94.7% for 3' UTR SNPs in WGS to ~100% for most SNPs identified by WES.  
239 Altogether only a small fraction of SNPs (WES = 834 and WGS = 2,195) were exclusive  
240 to a particular platform (**Figure 2a**). Considering small indels, the WES and WGS data  
241 had lower concordance than SNPs (**Table 3**). Although WES detected 1,738 high impact  
242 indels and WGS detected 1,931, the percentage of commonly identified and exclusive  
243 indels showed more variation between consequence categories than SNPs. For both  
244 SNPs and indels, high impact mutations represented a disproportionate fraction of the  
245 platform exclusive variants.

246 Across samples, each individual cat carried approximately 80,000 SNPs total, with only  
247 marginal differences between platforms and individuals (**Figure 2b**). Alternatively,  
248 platform exclusive SNPs, particularly for WGS, did not exhibit these same patterns. The  
249 four male cats, each carried approximately twice as many WGS exclusive variants as  
250 female cats (**Figure 2c**).

251 Another method for characterizing platform exclusive SNPs, is to measure their allele  
252 count distributions. Compared to common SNPs identified from WES, exclusive SNPs  
253 were heavily skewed toward allele counts of one (**Figure 2d**). Using common SNPs as a  
254 truth set for comparison, the WES exclusive allele count distribution is consistent with

255 SNPs identified by random error, as most of these SNPs only appear once in the dataset.  
256 Moreover, this result is reflected by the Ti/Tv ratios of each dataset. WES common SNPs  
257 are at 3.92, indicating a low concentration of false positive variant sites, while WES  
258 exclusive SNPs are at 1.52, indicating a high concentration of false positive variant sites.  
259 Alternatively, allele counts for WGS exclusive SNPs have two peaks. The first is at an  
260 allele count of one, which is similar to WES exclusive SNPs, and the second is at an allele  
261 count of four, which is suggestive of more systematic error in variant detection. This  
262 second peak for WGS exclusive SNPs is likely consistent with the increased WGS  
263 exclusive variant detection observed in male cats. For WGS SNPs, the Ti/Tv ratios for  
264 both common and exclusive SNPs is similar to WES SNPs, where exclusive SNPs are  
265 enriched for false positive variant sites.

266 **WGS versus WES bias in variant discovery.** To detect bias toward specific genes using  
267 the WGS and WES platforms, the number of variants per gene was compared between  
268 WGS and WES results (**Supplementary Data S2**). A large number of genes had greater  
269 than 20 more WGS variants than WES variants (**Figure 3**). To investigate the cause for  
270 these outliers, the top 50 of these outlier genes were selected for further analysis  
271 (**Supplementary Data S3**). Of these, 14 genes were found on the X chromosome,  
272 suggesting these differences in variant detection may correspond to the increased  
273 number of WGS exclusive SNPs in males observed in (**Figure 2c**) (**Supplementary data**  
274 **S3**). Apart from enrichment on chromosome X, another cluster of 13 genes with WGS  
275 biased variant detection were located on chromosome D1. These genes were mostly  
276 olfactory receptors, which are usually repetitive and therefore difficult to design unique  
277 bait probes. Another gene of note, LOC101099449, contained 713,328 bp of target

278 sequence. When analyzed more closely, LOC101099449's target sequence overlapped  
279 an entire Immunoglobulin lambda locus at chromosome D3:20097014 - 20810341, a  
280 region that is usually highly variable between individuals. All other genes with WGS-  
281 biased variant detection were distributed randomly.

282 To further investigate increased WGS-biased variant detection on chromosome X, the  
283 mean number of variants per individual was compared between males and females  
284 (**Table 4**). Across autosomes and sequencing platforms, sex-based percentage  
285 differences were relatively low, ranging between 7% and 10%. Alternatively, across both  
286 gene groupings, the percentage difference between the sexes on the X chromosome  
287 were much higher. For the top 50 WGS outlier genes, both platforms showed an  
288 approximate 98% sex difference, whereas all genes showed a 61.09% sex difference for  
289 WGS and a 45.02% sex difference for WES. Since the percentage sex difference in outlier  
290 genes is similar across both platforms, results suggest that platform bias on chromosome  
291 X is more likely due to platform specific increased variant detection in these regions,  
292 rather than differential abilities of platforms to detect variants in either sex. Importantly,  
293 the actual number of chromosome X sex differences in both platforms is similar across  
294 gene groupings. In the top 50 WGS outliers, the difference between the chromosome X  
295 mean male and female SNP counts is 1340.92, while across all X chromosome genes  
296 this same difference is equal to 1202.5 (**Table 4**).

297 To examine the potential overlap between platform and sex bias, the distribution of SNPs  
298 per gene along chromosome X were analyzed. Platform biased genes are clustered  
299 between positions 15 to 70 Mb (**Figure 4a**). Across both platforms, these genes also have  
300 the highest SNP concentration, with > 20 SNPs per kb of coding sequence (**Figure 4a**).

301 Alternatively, the majority of genes outside this region have SNP concentrations of < 5  
302 SNPs per kb of coding sequence. Regarding sex bias, while the overall percentage  
303 difference across platforms is similar (**Table 4**), individual genes show platform specific  
304 variability in effect size. A larger number of WGS genes than WES genes show a 4-fold  
305 bias toward variant detection in males (**Figure 4b**). However, despite this variation across  
306 platforms, the genes with increased sex bias are indeed the same genes with increased  
307 platform bias (**Supplementary Data S4**). Therefore, on chromosome X, platform biases  
308 and sex biases in SNP discovery appear confounded, as numerous factors within the  
309 same genes are relatively consistent across both platforms. This suggests both biases  
310 have a similar underlying root cause differently expressed in each platform.

311 A potential cause of sex bias in variant discovery is that the biased genes have degraded  
312 copies on the Y chromosome. For the ten known feline X chromosome genes with  
313 degraded Y copies,<sup>46</sup> the total number of SNPs per platform and the mean number of  
314 SNPs per individual were calculated. Of these ten genes, nine have platform specific  
315 differences in SNP discovery greater than 11 and are therefore among the top 50 outlier  
316 genes for platform specific bias (**Supplementary Table 4**). Moreover, almost all SNPs  
317 found in these genes were found only in males, regardless of platform. For WGS there  
318 was an average total of 1169.25 SNVs found in males with only an average total of 7.83  
319 found in females. For WES the numbers were similar with an average total of 774.5 SNPs  
320 found in males and an average total of 7.83 SNPs found in females (**Supplementary**  
321 **Table 4**). Together these results indicate a major portion of sex bias in variant discovery  
322 is due to the absence of a Y chromosome in the *Felis\_catus\_9.0* assembly.



323 **Known variant validation.** Using Ensembl 99 for annotation with selection of exons with  
324 +/- 30 bp to match exome capture design and visualized using VarSeq (GoldenHelix, Inc).  
325 A majority of the 115 variants in the domestic cat documented as causal for diseases and  
326 traits affect the coding regions or a splice donor/acceptor site<sup>47</sup>. Forty-four known variants  
327 were identified in the WES cohort. All variants for coat colors and diseases known to be  
328 present in the ten cats were identified, including the alleles in the loci for *Agouti* (*ASIP* - *a*  
329 <sup>48</sup>), *Brown* (*TYRP1* - *b*)<sup>49</sup>, *Color* (*TYR* - *c<sup>s</sup>*)<sup>50</sup>, *Dense* (*MLPH*)<sup>51</sup>, *Longhair* (*FGF5*)<sup>52</sup>, Lykoi  
330 (*HR*)<sup>53</sup>, Bengal (*KIF3B*)<sup>54</sup> and Persian progressive retinal degeneration (*AIPL1*)<sup>27</sup>,  
331 hydrocephalus (*GDF7*)<sup>55</sup>, and others (**Supplementary Data 5**). The cats had various  
332 known mutations affecting cat blood type. As anticipated, the *KIT* intron 1 structural  
333 variants for *White* and *Spotting* were not identified, as well as the structural variant in  
334 *UGDH* causing dwarfism<sup>27</sup>.

335 **Novel candidate variant discovery.** Novel DNA variants were explored as causal for  
336 diseases and traits in 33 cats. A novel frameshift mutation in *polycystin 2* (*PKD2*)<sup>56</sup>, a  
337 gene associated with PKD, was predicted to disrupt protein function in a Siberian cat  
338 shown by ultrasound to have PKD. The c.2211delG causes a p.Lys737Asnfs\*2 at position  
339 B1:134992553. This variant was heterozygous in the affected cat and unique to the  
340 exome data and not identified in the 195 cat 99 Lives variant dataset<sup>29</sup>.

341 The *lysophosphatidic acid receptor 6* (*LPAR6*) c.250\_253delTTTG variant that causes a  
342 p.Phe84Glufs\*9 and is associated with the autosomal recessive rexoid (marsella wave)  
343 coat of the Cornish rex breed was detected in a Peterbald cat, which is a hairless breed  
344 <sup>57,53</sup>. However, the hairless trait is considered autosomal dominant by cat breeders. The  
345 annotation also suggested a c.249delG causing a p.Phe84Leufs\*10, therefore, this



346 Peterbald cat is suggested as a compound heterozygous for two mutations juxtaposed in  
347 *LPAR6*. This variant was heterozygous in the affected cat and unique to the exome data  
348 and not identified in the 195 cat 99 Lives variant dataset. Known feline disease variants  
349 were also re-identified (**Supplementary Data 5**)<sup>29</sup>. A *solute carrier family 3 member 1*  
350 (*SLC3A1*) variant was homozygous in a Greek cat presenting with cystinuria<sup>58</sup>. The  
351 c.1342C>T causing a p.Arg448Trp at position A3:66539609 has been previously  
352 documented to be associated with this condition. No other cat in the exome dataset had  
353 this variant. Many of the variants associated with cat blood group B and its extended  
354 haplotype were detected in one to 11 cats, suggesting five cats as Type B, one was  
355 confirmed<sup>59</sup>. Variants were detected in *APOBEC3*, which is associated with FIV infection  
356 in cats, and three cats had the allelic combination that produces the IRAVP amino acid  
357 haplotype that is associated with FIV resistance<sup>60</sup>. Unexpectedly, two cats were  
358 heterozygous for a porphyria variant in *UROS* (c.140C>T, c.331G>A)<sup>61,62</sup>, one cat was  
359 homozygous for *FXII* deficiency variant (FXII\_1631G>C)<sup>61</sup>, which had died as a kitten,  
360 and one cat was heterozygous for a copper metabolism deficiency in *ATP7B*<sup>63</sup>. Additional  
361 variants for neuronal ceroid lipofuscinosis, pycnodysostosis, Ehlers-Danlos syndrome,  
362 hypothyroidism, and hypovitaminosis D, and several individual specific variants for  
363 hypertrophic cardiomyopathy are under further investigation (**Table 1**).

## 364 **Discussion**

365 Whole exome sequencing has flourished over the past decade and is becoming the state-  
366 of-the-art technology for Precision / Genomic Medicine. Well recognized for clinical  
367 applications in human medicine, the success of WES is highly dependent on the accuracy  
368 of the genome assembly and annotation<sup>10</sup>. Well annotated genomes, such as human and

369 mice, has allowed the development of various exome capture products that range from  
370 particular genes of focus for clinical applications to more extensive designs that include  
371 5' and 3' untranslated regions, miRNA, lncRNA, suspected regulatory elements and  
372 variation is the exon flanking sequence length. For mammals with ~2.4 – 3.0 Gb  
373 genomes, exome designs have included 49.6 Mb for mouse, 54 Mb for cow, 71 Mb and  
374 146.8 Mb in rats<sup>64,65</sup> and ~48.2 Mb for humans. In domestic dog, products have ranged  
375 from ~53 Mb – 152 Mb, capturing up to 6% of the genome, with an overlap of ~34.5 Mb  
376 of the genome between the capture designs<sup>15-18</sup>. Overall, the size of the capture design  
377 is a balance between sequencing costs, larger designs imply higher costs, and the  
378 intended applications of the product. Presented is a WES capture platform designed  
379 specifically for *Felis Catus*.

380 The sequence capture probes for the cat WES were designed from the annotated  
381 *Felis\_catus\_9.0* genome assembly, which is one of the more robust long-read based  
382 assemblies for mammals, strongly supporting efficient design<sup>29</sup>. The design included 35  
383 Mb, primarily focusing on exomes and the flanking regions to detect splice donor – acceptor  
384 variants as little annotation for miRNA is available for cats. The total gene count in cats  
385 is slightly smaller as compared to dogs, with dogs having 291 more protein coding  
386 sequences, contributing to a smaller target size in cat. The success of disease variant  
387 identification is dependent on several factors, including sequencing depth and efficient  
388 design of the probes that allow adequate read coverage for variant detection. The  
389 success of disease variant identification is dependent on several factors, including  
390 sequencing depth, and efficient design of the probes that are on target, thereby reducing  
391 waste in sequencing costs, and allow adequate read coverage for variant detection. The

392 percent of unique reads was consistent for all cats, averaging 81 – 82%, and nearly 100%  
393 aligned to the cat genome as intended. A read coverage of ~20x is regarded as the  
394 standard to efficiently detect heterozygous variants<sup>66</sup>. In the first 10 cats sequenced, the  
395 mean 267x coverage indicates a maximum coverage of 99% of the exonic sequences  
396 had aligned coverage >20x coverage. For the 31 cats with an average coverage of 80x,  
397 96.41% of the bases were on target with greater than 20x coverage. In comparison to the  
398 first domestic dog exome design, which covered 52.8 Mb (<2% of the genome) divided  
399 over 203,059 regions, at a lower mean sequencing depth over 8 samples (102x), the dog  
400 design had a higher percentage of mapped reads at ~87 – 90%. However, when  
401 comparing base coverages, 93 to 94% (<49 Mb) of the targeted bases (<53 Mb) were  
402 covered at least once and 89 to 91% were covered at least five times in the canine  
403 design<sup>15</sup>, while the cat coverages were higher at nearly 100%. The pig exome capture  
404 probes demonstrate 90% of bases covered at 20x coverage, discovering 264,000 SNPs  
405 and indels<sup>67</sup>. Overall, direct comparisons are difficult due to the differences in annotation,  
406 genome assembly accuracy, and design techniques. For example, the cat design  
407 included 30 bp flanking the exon boundaries and a maximum of five close matches in the  
408 genome was allowed when selecting the capture probes. Both of these attributes were  
409 zero for the canine design.

410 The intended application of the WES design for the cat is the identification of heritable,  
411 Mendelian diseases and phenotypes. To assess the efficiency of the feline exome design,  
412 ten matched samples with WGS and WES data were compared. The ten cats had an  
413 average of ~30x WGS coverage and ~267x for the WES coverage. The vast majority of  
414 SNPs and indels in target regions were detected by both platforms. Altogether, SNP

415 discovery with the feline exome probes was extremely consistent with variant discovery  
416 from WGS, 99.4% of WES SNPs were detected in WGS while only 1.5% of WGS SNPs  
417 were absent from the WES dataset. Alternatively, indel discovery was less consistent  
418 across platforms, where 92.5 % of WES indels were detected in the WGS indel set and  
419 12.2% of WGS indels were absent from the WES indel set. Generally, indel identification  
420 is more prone to errors than SNP identification, therefore the reduced indel consistency  
421 across platforms may be reflective of their difficulty to correctly identify using either  
422 platform. Differences in the number of common variants between platforms is due to  
423 differential filtering, as common variants were identified prior to when filtering was  
424 performed. However, since high impact mutations are generally rare due to their impact  
425 on disease processes, their enrichment within platform exclusive variant sets could be  
426 indicative of random errors. In the same manner, low impact variants represent a lower  
427 than expected fraction of platform exclusive variants.

428 For a small number of genes, a larger number of SNPs were detected using WGS. These  
429 genes were mostly restricted to olfactory receptors on chromosome D1 and genes on the  
430 X chromosome that have degraded copies on the Y. The repetitive nature of olfactory  
431 receptors means they are likely to cause complications in hybridization and mapping.  
432 Since olfactory receptors are rarely involved in disease, loss of these genes is barely an  
433 impediment for diagnostic purposes. For X chromosome WGS biased genes, there was  
434 also bias toward increased WGS variant discovery in males. One potential cause is these  
435 genes belong to the degenerate X region of the Y chromosome. A collection of 10 known  
436 X chromosome genes with degrading Y chromosome copies all showed high levels of sex  
437 bias and platform bias<sup>46</sup>. The reason these genes had more variants in males is because

438 the Y chromosome copies contained a large number of mismatches. Similarly, the  
439 increased number of variants may have also affected hybridization of Y chromosome  
440 fragments to X chromosome probes, leading to reduced detection of variants in WES.  
441 Moreover, the number of variants in females for these genes was largely consistent  
442 across platforms, indicating that discrepancies are most likely due to the presence of the  
443 Y chromosome. The impact from degraded X genes on the Y chromosomes propagated  
444 throughout the analysis. WGS exclusive SNPs were more common in males and the allele  
445 count distribution contained a peak at an allele count of four. Even though the effect was  
446 found across both platforms, it was especially observable in the WGS exclusive dataset  
447 and may have otherwise remained hidden. Importantly, while the feline exome set  
448 contained probes for *DDX3Y*, *USP9Y*, *UBE1Y*, and *KDM5D*, which are all Y chromosome  
449 degraded X genes, these genes were not included in the reference genome used to align  
450 reads. Despite, this absence of the partial Y assembly, many Y chromosome degraded X  
451 genes do not have probes designed. Overall, both WGS and WES analysis in the cat will  
452 be greatly improved by the assembly of a domestic cat Y chromosome, indicating the  
453 importance of developing an improved Y chromosome assembly in the cat.

454 Variants were investigated to identify novel candidate *de novo* mutations. Various known  
455 diseases and phenotypes were first confirmed to test the accuracy of the design. Known  
456 causative alleles in *Agouti*, *Brown*, *Color*, *Dense*, *Gloves*, *Dilution*, *Extension*, *Long*, *Lykoi*,  
457 and hairless coat types were confirmed<sup>47</sup>. Disease variants were confirmed for candidate  
458 alleles in hydrocephalus, hypertrophic cardiomyopathy, and progressive retinal atrophy.  
459 However, known structural variants were not detected nor intronic variants, as expected.  
460 When analyzing discordant reads in WGS dwarf sample, a deletion and rearrangement

461 indicating a structural variant is visible in the *UDGH* gene. The discordant reads  
462 associated with this variant do not show up in the WES analysis (**Supplementary Figure**  
463 **1**). Therefore, the WES approaches will likely fail to identify structural variants, an  
464 important limitation of the designs as SVs may account for up to 50% or more of disease  
465 variants<sup>13</sup>.

466 Novel causal variants are also suggested from the collection of cats used for the WES  
467 design study. Feline PKD is a common inherited autosomal dominate disease affecting  
468 about 6% of the world's cats<sup>44</sup>. PKD is characterized by fluid filled cysts than form in in  
469 the bilateral kidneys and may even form in the in the liver and pancreas and may lead to  
470 renal failure<sup>68</sup>. Many of the features of PKD are similar to human ADPKD and recent  
471 studies have cat have demonstrated the utility of the model<sup>24,69</sup>. The c. 10063C>A  
472 mutation in exon 29 of *PKD1* was the only known causative allele for cat ADPKD<sup>44</sup>,  
473 however, for human ADPKD, variants are found throughout *PKD1*. The *polycystin 2*  
474 (*PKD2*) c.2211delG at position B1:134992553 causes a p.Lys737Asnfs\*2 and was  
475 identified in a Siberian cat from Europe, indicating additional alleles may be segregating  
476 for PKD in cats.

477 Domestic cats have various forms of atrichia and hypotrichia that have led to the  
478 development of specific breeds. The two breeds that are recognized as completely  
479 hairless are the Sphynx and Donskoy. Donskoy cats are a breed of Russian cats where  
480 the loss of hair is determined by semi-dominant gene. Peterbald cats were bred in Russia  
481 in 1994 as a product of a Donskoy and an Oriental Shorthair cross, and are often born  
482 with no hair, or lose their hair over time. Cornish Rex, a hypotrichia breed, that is  
483 characterized by a curly coat, is caused by a homozygous mutation in *LPAR6*<sup>70</sup>. In this

484 study, the examined Peterbald cat had the 4 base pair deletion *LPAR6* for the Cornish  
485 rex. This cat may be a compound heterozygote for a deletion that is in juxtaposition to the  
486 Cornish rex variant. Both variants cause premature stop codons a few amino acids  
487 downstream. Several other diseases are under investigation with functional studies to  
488 support their causality in diseases.

489 A variety of additional disease-associated variants were identified in the exome data,  
490 including variants for blood types and re-identification of alleles for cystinuria, in which the  
491 cat was homozygous and affected, indicating a second cat with the disease variant from  
492 a different region of the world. The WES also supports the determination of allele  
493 frequencies of disease variants, identifying heterozygote cats for recessive diseases,  
494 such as, porphyria, Factor XII deficiency and copper metabolism<sup>61 71 63</sup>. Thus, together  
495 with the WGS 99 Lives dataset, the variant frequency data can help determine the  
496 likelihood of variants being causal for diseases. The variant frequencies may also be  
497 useful for cross-species comparisons to hopefully better define variants of uncertain  
498 significance<sup>72</sup>.

499 Precision / Genomic Medicine, i.e. genomic DNA profiling, in companion animals allows  
500 veterinarians to adapt treatments to the specific animal and to the specific disease type<sup>73</sup>.  
501 Many rare diseases and cancers have poor prognosis, with some less than 90 days, thus,  
502 Precision / Genomic Medicine may help discover alternate and more effective  
503 treatments<sup>74</sup>. The Undiagnosed Diseases Program of the National Institutes of Health  
504 routinely uses WES, suggesting veterinary medicine could benefit in the same manner<sup>75</sup>.  
505 WES, when compared to WGS, has proven more cost effective, more time efficient and  
506 requires fewer computing resources. Alternative uses for this exome resource could also

507 so be developed, examples include resequencing of ancient DNA samples and important  
508 biological regions, such as the major histocompatibility complex<sup>76</sup>. The effective use of  
509 WES in a Precision Medicine context depends on its ability to discover disease variants.  
510 The presented feline WES capture design is robust for disease variant detection in cats.  
511 The vast majority of variants discoverable using WGS were also found using WES, known  
512 variants were identified and several novel variants were suggested and can be evaluated  
513 in detail. Importantly, based on our findings, improvements in the cat exome capture  
514 resource are also expected.

515

## 516 **Acknowledgments**

517 Funding was provided in part by the Gilbreath McLorn Endowment of the MU College of  
518 Veterinary Medicine, Winn Feline Foundation / Miller Trust (MT18-009, MT19-001). We  
519 thank Thomas Juba for sample processing and consultation on variant validation. We  
520 thank Dr. Bill Murphy for advice on Y chromosome gene sequences.

521

522

523

524

525

526

527

528

529



530 **Table 1. Signalment and diseases of 41 cats for WES evaluation.**

531 \*Mutations as tentative causal variants for diseases presented.

| No.       | Id.   | Breed            | Sex               | Disease / Trait                  | Gene(s)                 |
|-----------|-------|------------------|-------------------|----------------------------------|-------------------------|
| 1         | 19725 | Lykoi            | F                 | Lykoi                            | <i>HR</i>               |
| 2         | 13230 | Mixed Breed      | F                 | Bengal PRA / Bobbed tail         | <i>KIF3B / HES7</i>     |
| 3         | 14056 | Mixed Breed      | M                 | Persian PRA / Long               | <i>AIPL1 / FGF5</i>     |
| 4         | 17994 | Mixed Breed      | F                 | Hydrocephalus                    | <i>GDF7</i>             |
| 5         | 19067 | Munchkin         | F                 | Dwarfism / Dominant White        | <i>UGDH / KIT</i>       |
| 6         | 5012  | Oriental         | M                 | Lymphoma                         | <i>Unknown</i>          |
| 7         | 20382 | Peterbald        | M                 | <i>Hairless</i>                  | <i>LPAR6*</i>           |
| 8         | 11615 | Random Bred      | M                 | <i>Dominant White</i>            | <i>KIT</i>              |
| 9         | 18528 | Random Bred      | M                 | <i>Spotting</i>                  | <i>KIT</i>              |
| 10        | 20424 | Siberian         | F                 | <i>Long / Cardiac disease</i>    | <i>FGF5 / Candidate</i> |
| 11        | 22550 | Bengal           | F                 | Polyneuropathy                   | <i>Unknown</i>          |
| 12        | 20957 | Devon Rex        | U                 | Papilloma virus                  | <i>Unknown</i>          |
| 13        | 22752 | Devon Rex        | M                 | Neurological disorder            | <i>Unknown</i>          |
|           | 21464 |                  |                   |                                  |                         |
| 14 -15    | 21983 | Ojos Azules      | 1F:1M             | Ojos Azules                      | <i>Unknown</i>          |
| 16        | 20964 | Oriental         | F                 | Cardiac disease                  | <i>Unknown</i>          |
| 17        | 22728 | Random bred      | F                 | Cystinuria                       | <i>SLC3A1*</i>          |
| 18        | 20617 | Random Bred      | M                 | Neuronal ceroid lipofuscinosis   | <i>Candidate</i>        |
| 19        | 20948 | Random Bred      | M                 | Cinnamic acid urea               | <i>Unknown</i>          |
| 20        | 21153 | Random Bred      | M                 | Ambulatory paraparesis           | <i>Unknown</i>          |
| 21        | 22287 | Random Bred      | F                 | Myotonia congenita               | <i>Unknown</i>          |
| 22        | 22397 | Random Bred      | M                 | Neurological disorder            | <i>Unknown</i>          |
| 23        | 22505 | Random Bred      | M                 | Cardiac disease                  | <i>Unknown</i>          |
| 24        | 22623 | Random Bred      | U                 | Pycnodysostosis                  | <i>Candidate</i>        |
| 25        | 22740 | Random Bred      | F                 | Epidemolysis bullosa             | <i>Unknown</i>          |
| 26 – 27   | 22741 | Random Bred      | F:M               | Eyelid coloboma                  | <i>Unknown</i>          |
| 28        | 22751 | Random Bred      | M                 | Ehlers-Danlos                    | <i>Unknown</i>          |
| 29 – 30   | 22763 | Random Bred      | 2F                | Hypothyroidism                   | <i>Candidate</i>        |
| 31 – 32   | 22761 | Savannah         | 2M                | Hypovitaminosis D                | <i>Unknown</i>          |
| 33        | 21984 | Scottish Fold    | F                 | Cardiac disease                  | <i>Candidate</i>        |
| 34 – 35   | 20384 | Selkirk Rex      | 1F:1U             | Seizures                         | <i>Unknown</i>          |
| 36        | 20953 | Siamese          | F                 | Cardiac disease                  | <i>Candidate</i>        |
| 37        | 22622 | Siberian         | U                 | PKD                              | <i>PKD2*</i>            |
| 38        | 22711 | Singapura        | F                 | Hypovitaminosis D                | <i>Candidate</i>        |
| 39 – 40   | 8641  | Tennessee Rex    | 1F:1M             | Rexoid hair coat                 | <i>Unknown</i>          |
| 41        | 6623  | Oriental         | M                 | Lymphoma                         | <i>Unknown</i>          |
| <b>41</b> |       | <b>14 breeds</b> | <b>19F:18M:4U</b> | <b>~31 diseases &amp; traits</b> |                         |

533

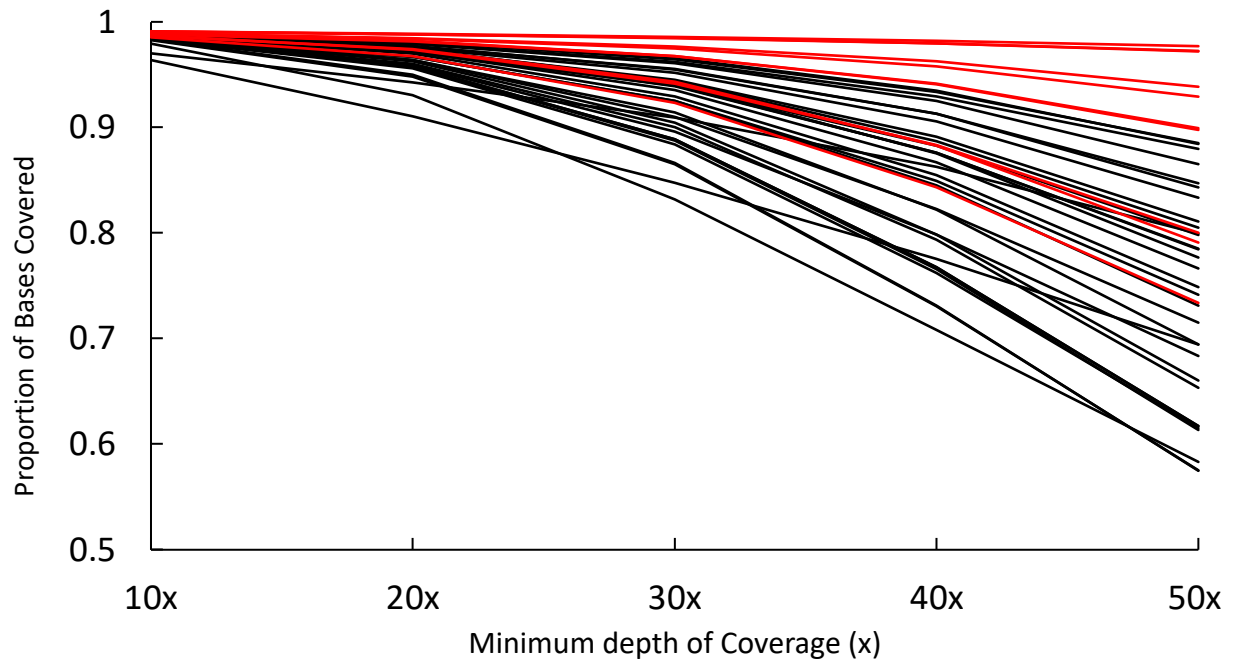

534

535 **Figure 1.** The proportion of bases covered with the exome capture probes. The initial 10  
536 samples are colored in red, with the X axis showing the depth of coverage, which is how many  
537 times a nucleotide base is covered starting at a depth of 10x and increasing to 50x.

538

539

540

541

542

543

544

545

546

547

548

| Impact          | Consequence     | WES (%)              |                  |               | WGS (%)              |                   |               |
|-----------------|-----------------|----------------------|------------------|---------------|----------------------|-------------------|---------------|
|                 |                 | Common               | Exclusive        | Total         | Common               | Exclusive         | Total         |
| High            | Splice acceptor | 97 (97)              | 3 (3)            | <b>100</b>    | 98 (89.9)            | 11 (10.1)         | <b>109</b>    |
| High            | Splice donor    | 137 (97.9)           | 3 (2.1)          | <b>140</b>    | 139 (88)             | 19 (12)           | <b>158</b>    |
| High            | Start lost      | 63 (96.9)            | 2 (3.1)          | <b>65</b>     | 63 (100)             | 0 (0)             | <b>63</b>     |
| High            | Stop gained     | 237 (97.9)           | 5 (2.1)          | <b>242</b>    | 232 (92.8)           | 18 (7.2)          | <b>250</b>    |
| High            | Stop lost       | 35 (100)             | 0 (0)            | <b>35</b>     | 36 (97.3)            | 1 (2.7)           | <b>37</b>     |
| <b>High</b>     | <b>All</b>      | <b>569 (97.8)</b>    | <b>13 (2.2)</b>  | <b>582</b>    | <b>568 (92.1)</b>    | <b>49 (7.9)</b>   | <b>617</b>    |
| Moderate        | missense        | 43518 (99.3)         | 309 (0.7)        | <b>43827</b>  | 43419 (98.1)         | 821 (1.9)         | <b>44240</b>  |
| <b>Moderate</b> | <b>All</b>      | <b>43516 (99.3)</b>  | <b>309 (0.7)</b> | <b>43825</b>  | <b>43417 (98.1)</b>  | <b>821 (1.9)</b>  | <b>44238</b>  |
| Low             | 3' UTR          | 2022 (97.9)          | 43 (2.1)         | <b>2065</b>   | 2031 (94.7)          | 114 (5.3)         | <b>2145</b>   |
| Low             | 5' UTR          | 2458 (99.5)          | 13 (0.5)         | <b>2471</b>   | 2459 (98.6)          | 35 (1.4)          | <b>2494</b>   |
| Low             | Splice region   | 3938 (99.5)          | 21 (0.5)         | <b>3959</b>   | 3923 (98.7)          | 50 (1.3)          | <b>3973</b>   |
| Low             | Stop retained   | 60 (100)             | 0 (0)            | <b>60</b>     | 58 (96.7)            | 2 (3.3)           | <b>60</b>     |
| Low             | Synonymous      | 87341 (99.6)         | 321 (0.4)        | <b>87662</b>  | 87182 (98.9)         | 956 (1.1)         | <b>88138</b>  |
| <b>Low</b>      | <b>All</b>      | <b>88584 (99.6)</b>  | <b>336 (0.4)</b> | <b>88920</b>  | <b>88417 (98.9)</b>  | <b>975 (1.1)</b>  | <b>89392</b>  |
| <b>All</b>      | <b>All</b>      | <b>144012 (99.4)</b> | <b>834 (0.6)</b> | <b>144846</b> | <b>143745 (98.5)</b> | <b>2194 (1.5)</b> | <b>145939</b> |

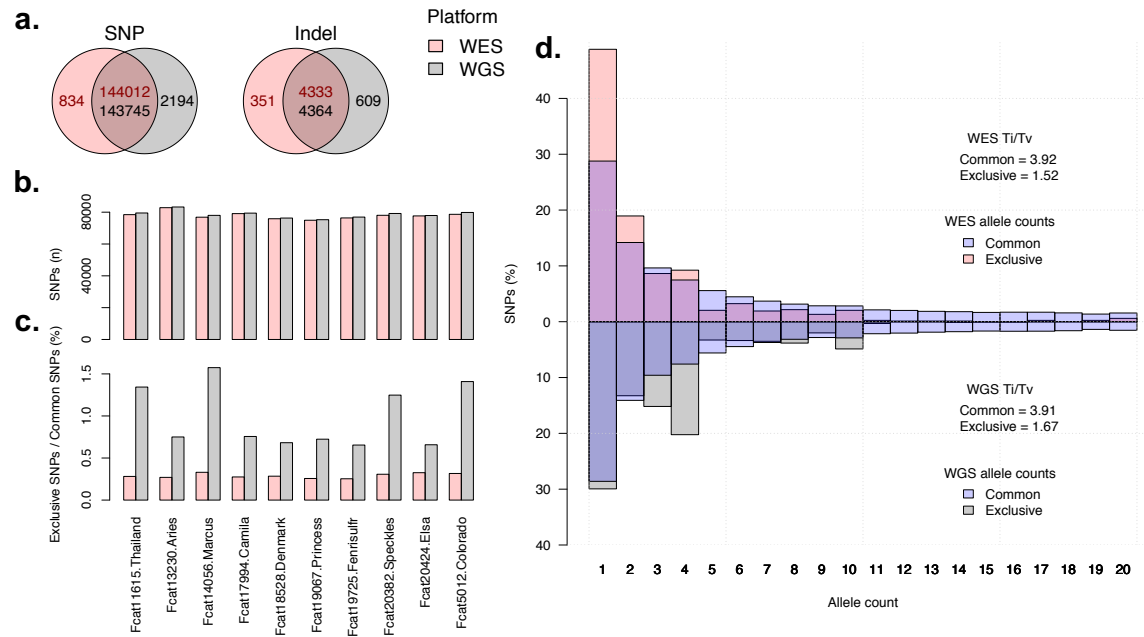

**Figure 2: Variant calling statistics for 10 cats sequenced on both platforms.** a) Venn diagrams showing the number of exclusive and common variants per platform. Dark red text indicates the number of variants found in WES and black text indicates the number of variants found in WGS. The reason the number of common variants differ between platforms is because common variants were identified prior to filtering. b) The number of SNPs found in each sample in both platforms. c) The percentage of SNPs found as exclusive to each sample for each platform. The first, third, eighth, and tenth samples are males. All other samples are female. d) Allele count distribution for common and exclusive SNPs in both platforms. WES SNPs are shown on top and WGS SNPs are shown upside down on the bottom. In addition, the Ti/Tv ratio for sets of SNPs is also shown

1 **Table 3: Indel consequence counts of WES versus WGS as determined by variant effect predictor.**

| Impact          | Consequence       | WES (%)            |                  |             | WGS (%)            |                   |             |
|-----------------|-------------------|--------------------|------------------|-------------|--------------------|-------------------|-------------|
|                 |                   | Common             | Exclusive        | Total       | Common             | Exclusive         | Total       |
| High            | Frameshift        | 1440 (93)          | 109 (7)          | <b>1549</b> | 1451 (84.8)        | 260 (15.2)        | <b>1711</b> |
| High            | Splice acceptor   | 69 (83.1)          | 14 (16.9)        | <b>83</b>   | 71 (69.6)          | 31 (30.4)         | <b>102</b>  |
| High            | Splice donor      | 107 (88.4)         | 14 (11.6)        | <b>121</b>  | 107 (81.1)         | 25 (18.9)         | <b>132</b>  |
| High            | Start lost        | 11 (100)           | 0 (0)            | <b>11</b>   | 11 (84.6)          | 2 (15.4)          | <b>13</b>   |
| High            | Stop gained       | 16 (76.2)          | 5 (23.8)         | <b>21</b>   | 17 (56.7)          | 13 (43.3)         | <b>30</b>   |
| High            | Stop lost         | 12 (92.3)          | 1 (7.7)          | <b>13</b>   | 12 (85.7)          | 2 (14.3)          | <b>14</b>   |
| <b>High</b>     | <b>All</b>        | <b>1602 (92.1)</b> | <b>137 (7.9)</b> | <b>1739</b> | <b>1615 (83.6)</b> | <b>316 (16.4)</b> | <b>1931</b> |
| Moderate        | Inframe deletion  | 709 (90.5)         | 74 (9.5)         | <b>783</b>  | 710 (91.1)         | 69 (8.9)          | <b>779</b>  |
| Moderate        | Inframe insertion | 557 (92.4)         | 46 (7.6)         | <b>603</b>  | 557 (90)           | 62 (10)           | <b>619</b>  |
| Moderate        | Protein altering  | 13 (81.3)          | 3 (18.8)         | <b>16</b>   | 13 (54.2)          | 11 (45.8)         | <b>24</b>   |
| <b>Moderate</b> | <b>All</b>        | <b>1267 (91.2)</b> | <b>122 (8.8)</b> | <b>1389</b> | <b>1268 (90.1)</b> | <b>139 (9.9)</b>  | <b>1407</b> |
| Low             | 3' UTR            | 173 (91.5)         | 16 (8.5)         | <b>189</b>  | 176 (81.5)         | 40 (18.5)         | <b>216</b>  |
| Low             | 5' UTR            | 194 (96.5)         | 7 (3.5)          | <b>201</b>  | 195 (91.5)         | 18 (8.5)          | <b>213</b>  |
| Low             | Splice region     | 641 (94.8)         | 35 (5.2)         | <b>676</b>  | 644 (92.9)         | 49 (7.1)          | <b>693</b>  |
| Low             | Start retained    | 7 (100)            | 0 (0)            | <b>7</b>    | 7 (100)            | 0 (0)             | <b>7</b>    |
| Low             | Stop retained     | 10 (100)           | 0 (0)            | <b>10</b>   | 10 (83.3)          | 2 (16.7)          | <b>12</b>   |
| <b>Low</b>      | <b>All</b>        | <b>299 (94.3)</b>  | <b>18 (5.7)</b>  | <b>317</b>  | <b>302 (92.9)</b>  | <b>23 (7.1)</b>   | <b>325</b>  |
|                 | <b>All</b>        | <b>4333 (92.5)</b> | <b>351 (7.5)</b> | <b>4684</b> | <b>4364 (87.8)</b> | <b>609 (12.2)</b> | <b>4973</b> |

2

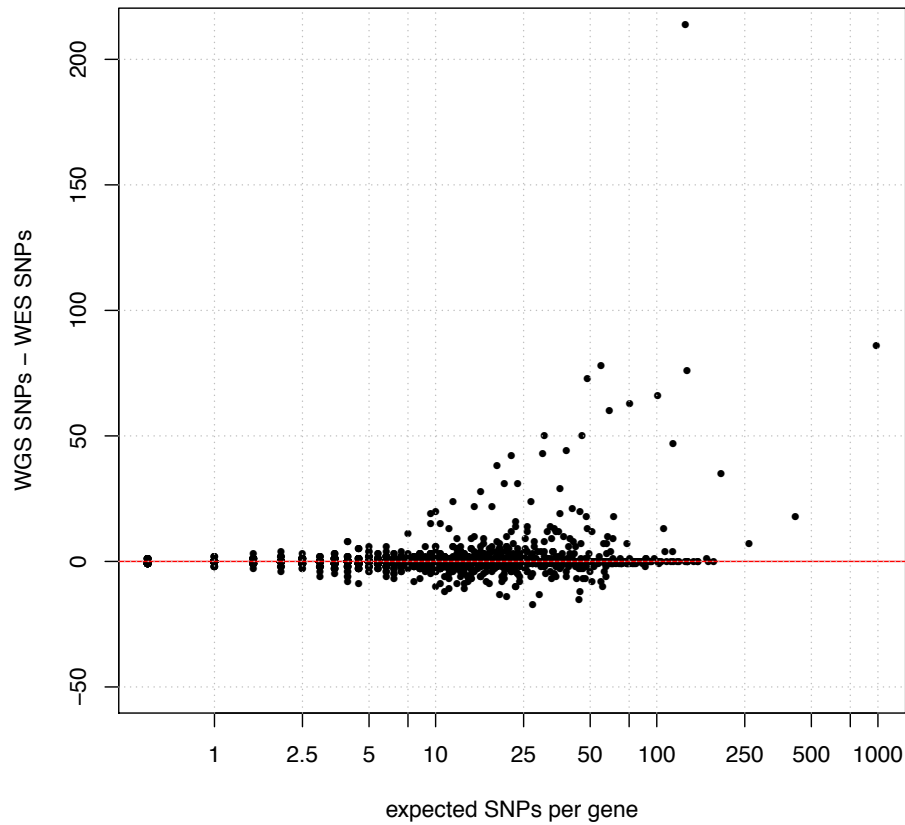

**Figure 3. Gene-wise platform bias.** Each individual point on the scatterplot is a gene with the y axis displaying differences in SNP counts per gene. Genes with more WGS SNPs than WES SNPs have positive values, where genes have negative values when there is more WES SNPs instead. Expected SNP number is calculated as the mean number of SNPs per gene across both platforms and is plotted on a log scale.

**Table 4: Mean SNPs per individual for ten WES and WGS cats.**

| <b>Genes</b>    | <b>Top 50 WGS outliers</b> |          |                             |            |          |                             |
|-----------------|----------------------------|----------|-----------------------------|------------|----------|-----------------------------|
| <b>Platform</b> | <b>WGS</b>                 |          |                             | <b>WES</b> |          |                             |
| <b>Sex</b>      | Male                       | Female   | Difference (%) <sup>1</sup> | Male       | Female   | Difference (%) <sup>1</sup> |
| Autosome        | 1595.00                    | 1445.67  | <b>149.33 (9.36)</b>        | 946.25     | 872.83   | <b>73.42 (7.76)</b>         |
| X chromosome    | 1363.75                    | 22.83    | <b>1340.92 (98.33)</b>      | 829.75     | 23.00    | <b>806.75 (97.73)</b>       |
| <b>Genes</b>    | <b>All</b>                 |          |                             |            |          |                             |
| <b>Platform</b> | <b>WGS</b>                 |          |                             | <b>WES</b> |          |                             |
| <b>Sex</b>      | Male                       | Female   | Difference (%) <sup>1</sup> | Male       | Female   | Difference (%) <sup>1</sup> |
| Autosome        | 53724.75                   | 57605.50 | <b>3880.75 (7.22)</b>       | 53189.50   | 57217.67 | <b>4028.17 (7.57)</b>       |
| X chromosome    | 1968.50                    | 766.00   | <b>1202.50 (61.09)</b>      | 1412.00    | 776.33   | <b>635.67 (45.02)</b>       |

<sup>1</sup>Percentage differences in parentheses were calculated as a fraction of mean SNPs per male individual.

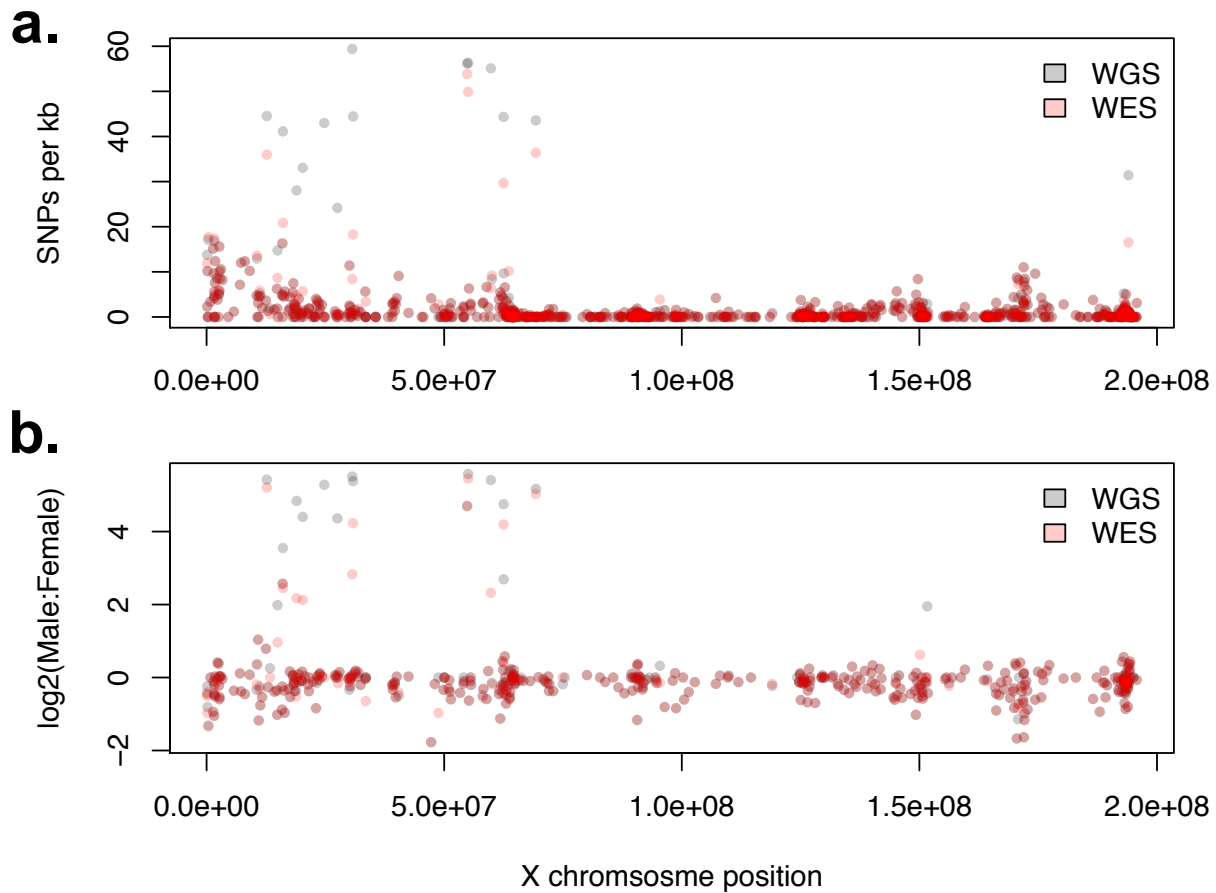

**Figure 4: Distribution of SNPs per gene along chromosome X. a)** Total SNPs per kb of coding sequence per gene. **b)** Sex biased variant detection along chromosome X. Bias is calculated as fold change ratio between the mean number of SNPs per individual per gene for males and females. Specifically, this was calculated for each gene as  $\log_2((\text{mean male SNPs} + 1) / (\text{mean female SNPs} + 1))$ . The ones were added to remove undefined results caused by dividing by the number 0.



## Supplementary Files

Supplementary Information: Supplementary Tables and Figures.

Supplementary Data S1: Exome primary targets

Supplementary Data S2: Platform bias of genes indicated as the difference in the total number of variants in each platform. Genes are sorted by WGS – WES variants, largest to smallest.

Supplementary Data S3: The top 50 genes from Supplementary Data S2 sorted by position.

Supplementary Data S4: Sex bias of all X chromosome genes. Columns represent the mean number of SNPs per individual for a particular platform and sex. For example, “WGS.m” is the mean number of WGS variants per male individual.

Supplementary Data S5: Confirmed known variants

## References

- 1 Mauler, D. A. *et al.* Precision Medicine in Cats: Novel Niemann-Pick Type C1 Diagnosed by Whole-Genome Sequencing. *J Vet Intern Med* **31**, 539-544, doi:10.1111/jvim.14599 (2017).
- 2 Bamshad, M. J. *et al.* Exome sequencing as a tool for Mendelian disease gene discovery. *Nat Rev Genet* **12**, 745-755, doi:10.1038/nrg3031 (2011).
- 3 Anderson, D., Baynam, G., Blackwell, J. M. & Lassmann, T. Personalised analytics for rare disease diagnostics. *Nat Commun* **10**, 5274, doi:10.1038/s41467-019-13345-5 (2019).
- 4 Hodges, E. *et al.* Genome-wide in situ exon capture for selective resequencing. *Nat Genet* **39**, 1522-1527, doi:10.1038/ng.2007.42 (2007).
- 5 Das, S., Idate, R., Cronise, K. E., Gustafson, D. L. & Duval, D. L. Identifying Candidate Druggable Targets in Canine Cancer Cell Lines Using Whole-Exome Sequencing. *Mol Cancer Ther* **18**, 1460-1471, doi:10.1158/1535-7163.MCT-18-1346 (2019).
- 6 Fresard, L. & Montgomery, S. B. Diagnosing rare diseases after the exome. *Cold Spring Harb Mol Case Stud* **4**, doi:10.1101/mcs.a003392 (2018).
- 7 Koboldt, D. C. *et al.* Exome-based mapping and variant prioritization for inherited Mendelian disorders. *Am J Hum Genet* **94**, 373-384, doi:10.1016/j.ajhg.2014.01.016 (2014).

- 8 An, Y. *et al.* De novo variants in the Helicase-C domain of CHD8 are associated with severe phenotypes including autism, language disability and overgrowth. *Hum Genet* **139**, 499-512, doi:10.1007/s00439-020-02115-9 (2020).
- 9 Koepfel, F. *et al.* Added Value of Whole-Exome and Transcriptome Sequencing for Clinical Molecular Screenings of Advanced Cancer Patients With Solid Tumors. *Cancer J* **24**, 153-162, doi:10.1097/PPO.0000000000000322 (2018).
- 10 Yang, Y. *et al.* Clinical whole-exome sequencing for the diagnosis of mendelian disorders. *N Engl J Med* **369**, 1502-1511, doi:10.1056/NEJMoa1306555 (2013).
- 11 Warr, A. *et al.* Exome Sequencing: Current and Future Perspectives. *G3 (Bethesda)* **5**, 1543-1550, doi:10.1534/g3.115.018564 (2015).
- 12 van Dijk, E. L., Auger, H., Jaszczyszyn, Y. & Thermes, C. Ten years of next-generation sequencing technology. *Trends Genet* **30**, 418-426, doi:10.1016/j.tig.2014.07.001 (2014).
- 13 Fairfield, H. *et al.* Exome sequencing reveals pathogenic mutations in 91 strains of mice with Mendelian disorders. *Genome Res* **25**, 948-957, doi:10.1101/gr.186882.114 (2015).
- 14 Fairfield, H. *et al.* Mutation discovery in mice by whole exome sequencing. *Genome Biol* **12**, R86, doi:10.1186/gb-2011-12-9-r86 (2011).
- 15 Broeckx, B. J. *et al.* Development and performance of a targeted whole exome sequencing enrichment kit for the dog (Canis Familiaris Build 3.1). *Sci Rep* **4**, 5597, doi:10.1038/srep05597 (2014).
- 16 Broeckx, B. J. G. *et al.* An exome sequencing based approach for genome-wide association studies in the dog. *Sci Rep* **7**, 15680, doi:10.1038/s41598-017-15947-9 (2017).
- 17 Broeckx, B. J. G. *et al.* Author Correction: Development and performance of a targeted whole exome sequencing enrichment kit for the dog (Canis Familiaris Build 3.1). *Sci Rep* **10**, 6285, doi:10.1038/s41598-020-62785-3 (2020).
- 18 Broeckx, B. J. *et al.* Improved canine exome designs, featuring ncRNAs and increased coverage of protein coding genes. *Sci Rep* **5**, 12810, doi:10.1038/srep12810 (2015).
- 19 Dillard, K. J. *et al.* A splice site variant in INPP5E causes diffuse cystic renal dysplasia and hepatic fibrosis in dogs. *PLoS One* **13**, e0204073, doi:10.1371/journal.pone.0204073 (2018).
- 20 Cox, M. L. *et al.* Exome sequencing reveals independent SGCD deletions causing limb girdle muscular dystrophy in Boston terriers. *Skelet Muscle* **7**, 15, doi:10.1186/s13395-017-0131-0 (2017).
- 21 Kim, K. K. *et al.* Whole-exome and whole-transcriptome sequencing of canine mammary gland tumors. *Sci Data* **6**, 147, doi:10.1038/s41597-019-0149-8 (2019).
- 22 Elvers, I. *et al.* Exome sequencing of lymphomas from three dog breeds reveals somatic mutation patterns reflecting genetic background. *Genome Res* **25**, 1634-1645, doi:10.1101/gr.194449.115 (2015).
- 23 Ramsey, S. A. *et al.* Cross-species analysis of the canine and human bladder cancer transcriptome and exome. *Genes Chromosomes Cancer* **56**, 328-343, doi:10.1002/gcc.22441 (2017).
- 24 Narfstrom, K., Holland Deckman, K. & Menotti-Raymond, M. The domestic cat as a large animal model for characterization of disease and therapeutic intervention in hereditary retinal blindness. *J Ophthalmol* **2011**, 906943, doi:10.1155/2011/906943 (2011).

- 25 Gurda, B. L., Bradbury, A. M. & Vite, C. H. Canine and Feline Models of Human Genetic Diseases and Their Contributions to Advancing Clinical Therapies. *Yale J Biol Med* **90**, 417-431 (2017).
- 26 OMIA. Online Mendelian Inheritance in Animal. (2020).
- 27 Lyons, L. A. *et al.* Whole genome sequencing in cats, identifies new models for blindness in AIPL1 and somite segmentation in HES7. *BMC Genomics* **17**, 265, doi:10.1186/s12864-016-2595-4 (2016).
- 28 Ofri, R. *et al.* Characterization of an Early-Onset, Autosomal Recessive, Progressive Retinal Degeneration in Bengal Cats. *Invest Ophthalmol Vis Sci* **56**, 5299-5308, doi:10.1167/iovs.15-16585 (2015).
- 29 Reuben M. Buckley, B. W. D., Wesley A. Brashear, Fabiana H. G. Farias, Kei Kuroki, Tina Graves, LaDeana W. Hillier, Milinn Kremitzki, Gang Li, Rondo Middleton, Patrick Minx, Chad Tomlinson, Leslie A. Lyons, William J. Murphy, Wesley C. Warren. in *bioRxiv* (2020).
- 30 Brashear, W. A., Raudsepp, T. & Murphy, W. J. Evolutionary conservation of Y Chromosome ampliconic gene families despite extensive structural variation. *Genome Res* **28**, 1841-1851, doi:10.1101/gr.237586.118 (2018).
- 31 Li, G. *et al.* Comparative analysis of mammalian Y chromosomes illuminates ancestral structure and lineage-specific evolution. *Genome Res* **23**, 1486-1495, doi:10.1101/gr.154286.112 (2013).
- 32 Ning, Z., Cox, A. J. & Mullikin, J. C. SSAHA: a fast search method for large DNA databases. *Genome Res* **11**, 1725-1729, doi:10.1101/gr.194201 (2001).
- 33 Michael R. Green, J. S. Molecular Cloning: A Laboratory Manual **Fourth**.
- 34 Buckley, R. M. *et al.* A new domestic cat genome assembly based on long sequence reads empowers feline genomic medicine and identifies a novel gene for dwarfism. *bioRxiv*, 2020.2001.2006.896258, doi:10.1101/2020.01.06.896258 (2020).
- 35 Li, H. Aligning sequence reads, clone sequences and assembly contigs with BWA-MEM. doi:arXiv preprint arXiv:1303.3997 (2013).
- 36 Li, H. *et al.* The Sequence Alignment/Map format and SAMtools. *Bioinformatics* **25**, 2078-2079, doi:10.1093/bioinformatics/btp352 (2009).
- 37 DePristo, M. A. *et al.* A framework for variation discovery and genotyping using next-generation DNA sequencing data. *Nat Genet* **43**, 491-498, doi:10.1038/ng.806 (2011).
- 38 Jun, G., Wing, M. K., Abecasis, G. R. & Kang, H. M. An efficient and scalable analysis framework for variant extraction and refinement from population-scale DNA sequence data. *Genome Res* **25**, 918-925, doi:10.1101/gr.176552.114 (2015).
- 39 Van der Auwera, G. A. *et al.* From FastQ data to high confidence variant calls: the Genome Analysis Toolkit best practices pipeline. *Curr Protoc Bioinformatics* **43**, 11 10 11-11 10 33, doi:10.1002/0471250953.bi1110s43 (2013).
- 40 Cunningham, F. *et al.* Ensembl 2019. *Nucleic Acids Res* **47**, D745-D751, doi:10.1093/nar/gky1113 (2019).
- 41 McLaren, W. *et al.* The Ensembl Variant Effect Predictor. *Genome Biol* **17**, 122, doi:10.1186/s13059-016-0974-4 (2016).
- 42 Knaus, B. J. & Grunwald, N. J. vcfr: a package to manipulate and visualize variant call format data in R. *Mol Ecol Resour* **17**, 44-53, doi:10.1111/1755-0998.12549 (2017).

- 43 Li, M. M. *et al.* Standards and Guidelines for the Interpretation and Reporting of Sequence Variants in Cancer: A Joint Consensus Recommendation of the Association for Molecular Pathology, American Society of Clinical Oncology, and College of American Pathologists. *J Mol Diagn* **19**, 4-23, doi:10.1016/j.jmoldx.2016.10.002 (2017).
- 44 Lyons, L. A. *et al.* Feline polycystic kidney disease mutation identified in PKD1. *J Am Soc Nephrol* **15**, 2548-2555, doi:10.1097/01.ASN.0000141776.38527.BB (2004).
- 45 Grahn, R. A. *et al.* Genetic testing for feline polycystic kidney disease. *Anim Genet* **35**, 503-504, doi:10.1111/j.1365-2052.2004.01213.x (2004).
- 46 Pearks Wilkerson, A. J. *et al.* Gene discovery and comparative analysis of X-degenerate genes from the domestic cat Y chromosome. *Genomics* **92**, 329-338, doi:10.1016/j.ygeno.2008.06.012 (2008).
- 47 Online Mendelian Inheritance in Animals, OMIA. Sydney School of Veterinary Science, {05/04/2020}. World Wide Web URL: <https://omia.org/>.
- 48 Gershony, L. C. *et al.* Who's behind that mask and cape? The Asian leopard cat's Agouti (ASIP) allele likely affects coat colour phenotype in the Bengal cat breed. *Anim Genet* **45**, 893-897, doi:10.1111/age.12206 (2014).
- 49 Lyons, L. A., Foe, I. T., Rah, H. C. & Grahn, R. A. Chocolate coated cats: TYRP1 mutations for brown color in domestic cats. *Mamm Genome* **16**, 356-366, doi:10.1007/s00335-004-2455-4 (2005).
- 50 Imes, D. L., Geary, L. A., Grahn, R. A. & Lyons, L. A. Albinism in the domestic cat (*Felis catus*) is associated with a tyrosinase (TYR) mutation. *Anim Genet* **37**, 175-178, doi:10.1111/j.1365-2052.2005.01409.x (2006).
- 51 Ishida, Y. *et al.* A homozygous single-base deletion in MLPH causes the dilute coat color phenotype in the domestic cat. *Genomics* **88**, 698-705, doi:10.1016/j.ygeno.2006.06.006 (2006).
- 52 Drögemüller, C., Rüfenacht, S., Wichert, B. & Leeb, T. Mutations within the FGF5 gene are associated with hair length in cats. *Animal genetics* **38**, 218-221, doi:10.1111/j.1365-2052.2007.01590.x (2007).
- 53 Buckley, R. M. *et al.* Werewolf, there wolf: variants in *Hairless* associated with hypotrichia and roaning in the lykoi cat breed. *bioRxiv*, 2020.2005.2007.082719, doi:10.1101/2020.05.07.082719 (2020).
- 54 Cogne, B. *et al.* Mutations in the Kinesin-2 Motor KIF3B Cause an Autosomal-Dominant Ciliopathy. *Am J Hum Genet*, doi:10.1016/j.ajhg.2020.04.005 (2020).
- 55 Yu, Y., Creighton, E. K., Buckley, R. M. & Lyons, L. A. A deletion in *GDF7* is associated with a heritable forebrain commissural malformation concurrent with ventriculomegaly and interhemispheric cysts in cats. *bioRxiv*, 2020.2005.2012.091686, doi:10.1101/2020.05.12.091686 (2020).
- 56 Kim, D. Y. & Park, J. H. Genetic Mechanisms of ADPKD. *Adv Exp Med Biol* **933**, 13-22, doi:10.1007/978-981-10-2041-4\_2 (2016).
- 57 Gandolfi, B. *et al.* The naked truth: Sphynx and Devon Rex cat breed mutations in KRT71. *Mamm Genome* **21**, 509-515, doi:10.1007/s00335-010-9290-6 (2010).
- 58 Mizukami, K., Raj, K. & Giger, U. Feline cystinuria caused by a missense mutation in the SLC3A1 gene. *J Vet Intern Med* **29**, 120-125, doi:10.1111/jvim.12501 (2015).

- 59 Kehl, A. *et al.* Molecular characterization of blood type A, B, and C (AB) in domestic cats and a CMAH genotyping scheme. *PLoS One* **13**, e0204287, doi:10.1371/journal.pone.0204287 (2018).
- 60 Yoshikawa, R. *et al.* A Naturally Occurring Domestic Cat APOBEC3 Variant Confers Resistance to Feline Immunodeficiency Virus Infection. *J Virol* **90**, 474-485, doi:10.1128/JVI.02612-15 (2016).
- 61 Clavero, S., Bishop, D. F., Giger, U., Haskins, M. E. & Desnick, R. J. Feline congenital erythropoietic porphyria: two homozygous UROS missense mutations cause the enzyme deficiency and porphyrin accumulation. *Mol Med* **16**, 381-388, doi:10.2119/molmed.2010.00038 (2010).
- 62 Clavero, S. *et al.* Diagnosis of feline acute intermittent porphyria presenting with erythrodontia requires molecular analyses. *Vet J* **198**, 720-722, doi:10.1016/j.tvjl.2013.10.008 (2013).
- 63 Asada, H. *et al.* Hepatic copper accumulation in a young cat with familial variations in the ATP7B gene. *J Vet Intern Med* **33**, 874-878, doi:10.1111/jvim.15399 (2019).
- 64 Foley, J. F. *et al.* Whole exome sequencing in the rat. *BMC Genomics* **19**, 487, doi:10.1186/s12864-018-4858-8 (2018).
- 65 Yoshihara, M. *et al.* Design and application of a target capture sequencing of exons and conserved non-coding sequences for the rat. *BMC Genomics* **17**, 593, doi:10.1186/s12864-016-2975-9 (2016).
- 66 Du, C. *et al.* Explorations to improve the completeness of exome sequencing. *BMC Med Genomics* **9**, 56, doi:10.1186/s12920-016-0216-3 (2016).
- 67 Robert, C. *et al.* Design and development of exome capture sequencing for the domestic pig (*Sus scrofa*). *BMC Genomics* **15**, 550, doi:10.1186/1471-2164-15-550 (2014).
- 68 Sato, R. *et al.* Epidemiological evaluation of cats associated with feline polycystic kidney disease caused by the feline PKD1 genetic mutation in Japan. *J Vet Med Sci* **81**, 1006-1011, doi:10.1292/jvms.18-0309 (2019).
- 69 Patterson, D. F., Haskins, M. E. & Jezyk, P. F. Models of human genetic disease in domestic animals. *Adv Hum Genet* **12**, 263-339, doi:10.1007/978-1-4615-8315-8\_4 (1982).
- 70 Gandolfi, B. *et al.* To the Root of the Curl: A Signature of a Recent Selective Sweep Identifies a Mutation That Defines the Cornish Rex Cat Breed. *PLoS One* **8**, e67105, doi:10.1371/journal.pone.0067105 (2013).
- 71 Maruyama, H., Hosoe, H., Nagamatsu, K., Kano, R. & Kamata, H. A novel missense mutation in the factor XII gene in a litter of cats with factor XII deficiency. *J Vet Med Sci* **79**, 822-826, doi:10.1292/jvms.16-0602 (2017).
- 72 Robinson, P. N. *et al.* Improved exome prioritization of disease genes through cross-species phenotype comparison. *Genome Res* **24**, 340-348, doi:10.1101/gr.160325.113 (2014).
- 73 Collins, F. S. & Varmus, H. A new initiative on precision medicine. *N Engl J Med* **372**, 793-795, doi:10.1056/NEJMp1500523 (2015).
- 74 Marconato, L. *et al.* Toxicity and outcome in cats with oral squamous cell carcinoma after accelerated hypofractionated radiotherapy and concurrent systemic treatment. *Vet Comp Oncol*, doi:10.1111/vco.12557 (2019).

- 75 Gahl, W. A., Boerkoel, C. F. & Boehm, M. The NIH Undiagnosed Diseases Program: bonding scientists and clinicians. *Dis Model Mech* **5**, 3-5, doi:10.1242/dmm.009258 (2012).
- 76 Gasc, C., Peyretailade, E. & Peyret, P. Sequence capture by hybridization to explore modern and ancient genomic diversity in model and nonmodel organisms. *Nucleic Acids Res* **44**, 4504-4518, doi:10.1093/nar/gkw309 (2016).
